1 Blood transfusion in care of patients with Visceral Leishmaniasis: a review  
2 of practices in therapeutic efficacy studies

3 Prabin Dahal\*<sup>1,2</sup>, Sauman Singh-Phulgenda<sup>1,2</sup>, James Wilson<sup>1,2</sup>, Glauca Cota<sup>3</sup>, Koert  
4 Ritmeijer<sup>4</sup>, Ahmed Musa<sup>5</sup>, Fabiana Alves<sup>6</sup>, Kasia Stepniewska<sup>1,2</sup>, Philippe J Guerin\*<sup>1,2</sup>

5

6 <sup>1</sup>Infectious Diseases Data Observatory (IDDO), Oxford, UK

7 <sup>2</sup>Centre for Tropical Medicine and Global Health, Nuffield Department of Medicine,  
8 University of Oxford, Oxford, UK

9 <sup>3</sup>Instituto René Rachou (IRR), Fiocruz, Minas Gerais, Brazil

10 <sup>4</sup>Médecins Sans Frontières, Amsterdam, Netherlands

11 <sup>5</sup>Institute of Endemic Diseases, University of Khartoum, Khartoum, Sudan

12 <sup>6</sup>Drugs for Neglected Diseases initiative, Geneva, Switzerland

13

14

15

16 **Keywords:** Kala azar; visceral leishmaniasis; transfusion; anaemia; haemoglobin

17

18

19 **\*Correspondence:** [prabin.dahal@ndm.ox.ac.uk](mailto:prabin.dahal@ndm.ox.ac.uk); [philippe.guerin@ndm.ox.ac.uk](mailto:philippe.guerin@ndm.ox.ac.uk)

## 20 **Abstract**

21 Anaemia is a common presentation feature in patients with visceral leishmaniasis (VL).  
22 Blood transfusion remains an important aspect of patient management in VL. However,  
23 triggers considered for making decisions on transfusion are poorly understood. This review  
24 is based on the Infectious Diseases Data Observatory (IDDO) VL clinical trials library, a  
25 database of all published efficacy studies since 1980 and has indexed 160 published trials  
26 (1980–2021). Description of blood transfusion was reported in 16 (10.1%) trials (n=3,459  
27 patients). Transfusion was initiated solely based on haemoglobin (Hb) measurement in 9  
28 studies, using a combination of Hb and other health conditions (epistaxis, poor health, or  
29 clinical instability) in 3 studies, and the criteria was unclear in 4 studies; Hb threshold ranged  
30 from 3-8 g/dL. Overall, the number of patients receiving transfusion was explicitly reported  
31 in 10 trials (n=2,421 patients enrolled). Of these, 217 patients underwent transfusion; 58  
32 before treatment initiation and 46 during treatment or the follow-up phase, and the time of  
33 transfusion was unclear in 113. The median proportion of patients who received a  
34 transfusion in a study was 8.0% [Interquartile range (IQR): 4.7% to 47.2%; range: 0-100%;  
35 n=10 studies]. This review describes the variation in current clinical practice and is an  
36 important initial step in policy/guideline development, where both the patient's  
37 haemoglobin concentration and clinical status must be considered.

38 **Word count:** abstract (n=219 words); main text (n = 2713 words)

## 39 Introduction

40 Visceral leishmaniasis (VL) is the most severe of the three forms of leishmaniasis and,  
41 is fatal without treatment. The disease typically presents insidiously and is characterised by  
42 protracted fever, hepatosplenomegaly and weight loss, often with evolving anaemia,  
43 leukopaenia and thrombocytopaenia leading to pancytopaenia.<sup>1</sup> At presentation, moderate  
44 anaemia around 7–10 g/dL is common but can evolve into severe anaemia.<sup>1</sup> While the  
45 underlying mechanism for the onset of anaemia in VL is likely multifactorial, the literature  
46 suggests the main cause is due to macrophage induced haemolysis in the spleen (“splenic  
47 sequestration, splenic haemophagocytosis”).<sup>2</sup>

48 The WHO defines anaemia based on the haemoglobin levels below the reference  
49 values based on age, sex, and pregnancy status.<sup>3</sup> In patients presenting with severe  
50 anaemia, especially when accompanied by signs of anaemia (typically shortness of breath,  
51 fatigue, weakness, light-headedness, occasionally chest pain), transfusion of blood products  
52 may be therefore clinically indicated. Red blood cell (RBC) transfusion may also be indicated  
53 in cases of acute blood loss due to invasive procedures such as splenic aspiration or venous  
54 catheterisation or due to spontaneous haemorrhage from a VL-related bleeding diathesis.  
55 Bleeding risk is exacerbated in VL patients as the disease can lead to alterations of hepatic  
56 coagulation factors and thrombocytopaenia.<sup>4</sup> Therefore, operational manuals from national  
57 control programmes suggest that haematological factors are taken into consideration prior  
58 to splenic aspirations (or completely contra-indicate splenic aspiration) and that blood  
59 transfusion services are in place for the management of acute blood loss.<sup>4–8</sup>

60 Despite a clear recognition of the importance of transfusion in the management of  
61 VL patients, the actual transfusion practice in clinical trials or daily management of patients

62 is poorly documented. In this review, we aim to collate information on blood transfusion  
63 among VL patients enrolled in therapeutic efficacy trials.

## 64 **Methodology**

### 65 **Information sources and search strategy for clinical trials**

66 This review synthesises data from studies indexed in the Infectious Diseases Data  
67 Observatory (IDDO) VL clinical trials library of prospective therapeutic studies from 1980  
68 until Nov-2021<sup>9</sup>; details of the search strategy adopted for each of the databases have been  
69 described elsewhere.<sup>10</sup> Data on the following aspects of design and conduct of studies  
70 captured by the IDDO VL library were extracted: the number of participants enrolled, details  
71 on the timing of transfusion (baseline, during treatment phase, or during the follow-up  
72 phase after discharge), and the details of the blood products transfused (whole blood,  
73 packed red blood cells (PRBC), plasma, or platelets), the haemoglobin threshold used for  
74 patient inclusion, and the transfusion triggers adopted.

### 75 **Data summary and analysis**

76 A descriptive summary of the data extracted is presented. The median proportion of  
77 patients reported to have received blood products is presented along with the range and  
78 inter-quartile range. No formal meta-analysis was undertaken owing to the large  
79 heterogeneity in transfusion practices adopted. All statistical analyses were carried out  
80 using R software.<sup>11</sup>

81 **Risk of bias assessment**

82           The risk of bias assessment in studies included in this review was carried out using  
83 the Cochrane Risk of Bias (ROB) tool for randomised controlled trials.<sup>12</sup> Risk of bias in non-  
84 randomised studies will be carried out using ROBINS-I tool.<sup>13</sup> Two reviewers (PD and SS)  
85 independently assessed the risk of bias.

## 86 Results

87 The IDDO systematic review library has currently indexed 160 publications (35,763  
88 patients; 1980–2021). There were 108 (67.5%) studies from the Indian subcontinent, 27  
89 (16.9%) from East Africa, 9 (5.6%) from the Mediterranean region, 7 (4.4%) from South  
90 America, 5 (3.1%) from Central Asia (the Middle East), and 4 (2.5%) were multi-regional  
91 studies. The haematological measures adopted for patient inclusion are presented in **Table**  
92 **1**. The minimum haemoglobin concentration required for inclusion was 3 g/dL in 8 (5.0%)  
93 studies, >3-5 g/dL in 38 (23.8%) studies, >5-7 g/dL in 22 (13.8%) studies, and unclear in the  
94 remaining 92 (57.5%) studies. Ranges of other haematological parameters considered at  
95 inclusion are presented in **Table 1**.

### 96 Transfused products and transfusion triggers (n=16 studies)

97 Of the 160 studies in the IDDO VL systematic review library, the description of blood  
98 transfusion was explicitly reported in 16 (10.1%) studies (n=3,459 patients; 1984-  
99 2018)(**Table 2**). 7/108 studies from the Indian sub-continent, 6/27 studies from East Africa,  
100 2/7 studies from South America, 1/5 studies from Central Asia and none of the 9 studies  
101 from the Mediteeranean region or none of the 4 multi-regional studies reported data on  
102 blood transfusion. Patients living with VL-HIV co-infection were included in 2 studies (n=113  
103 patients), excluded in 4 studies (n=384 patients), and unclear in the remaining 10 studies  
104 (n=2,962 patients). Pregnant women were included in 3 studies (n=996 patients), excluded  
105 in 4 studies (n=304 patients), and unclear in the remaining 9 studies (n=2,159 patients).

106 Transfusion was not required for any patient in 1 study, and in the remaining 15  
107 studies, transfusion of either whole blood or other blood products was reported (**Table 2**).  
108 Transfusion of blood (without specifying if whole blood was transfused or the blood

109 components) was reported in 12 studies, 1 study transfused red blood cells, and 2 studies  
110 reported transfusing either blood (without making distinction if whole blood or packed RBC)  
111 or platelets.

112 Transfusion was initiated solely based on the measured concentration of  
113 haemoglobin (or anaemia status) or platelet concentrations in 9 studies (**Table 2**). In 2  
114 studies from India, the transfusion trigger was a combination of measured haemoglobin  
115 concentration and existing of clinical conditions such as epistaxis or poor health <sup>14,15</sup>. In a  
116 study from Brazil <sup>16</sup>, the measured concentration of red cells or international normalisation  
117 ratio (INR) in addition to the clinical condition of the patient was adopted; transfusion of  
118 RBC was undertaken if a patient had severe anaemia (haemoglobin <8 g/dL) along with  
119 clinical instability and plasma transfusion was undertaken if the INR >1.5 and the patient  
120 had active bleeding. The criteria used for blood transfusion were not stated in the remaining  
121 4 studies (**Table 2**). The haemoglobin threshold used as a transfusion trigger was 3 g/dL in 2  
122 studies, 4 g/dL in 2 studies, 5 g/dL in 2 studies, 6 g/dL in 1 study, 8 g/dL in 1 study, anaemia  
123 or severe anaemia status (without reporting the haemoglobin threshold) in 3 studies, and  
124 the threshold was not clear in 1 study.

125 Of the 2 studies that reported on platelet transfusion, a threshold of <65,000 cells/ $\mu$ L  
126 was used in a study from India <sup>17</sup>, and in another study from Brazil [14], a threshold of  
127 <50,000 cells/ $\mu$ L was adopted among those who were given prophylactic transfusion before  
128 undertaking invasive procedures and a threshold of <20,000 cells/ $\mu$ L for patients with active  
129 bleeding (**Table 2**).

130 **The number of blood transfusions reported (n=10 studies)**

131 The number of patients who received transfusions were clearly reported in only 10  
132 trials (2,421 patients enrolled); a total of 217 patients received blood transfusions (total  
133 number of transfusion episodes were not reported). Of these 217 patients, 58 transfusions  
134 occurred before initiation of antileishmanial therapies<sup>15,18</sup>, 46 patients underwent  
135 transfusion during treatment or follow-up phase<sup>18-20</sup>, and the time when transfusion was  
136 carried out was not reported for the remaining 113 patients (**Table 2**). Overall, from the 10  
137 studies that clearly reported transfusion data, the median proportion of patients who  
138 received a transfusion at any time-point in the study was 8.0% [Interquartile range (IQR):  
139 4.7% to 47.2%; range: 0-100%] (**Figure 1**).

140 Two studies described transfusion among pregnant women: in a patient (1/16) in a  
141 study from Kenya (transfused at 3.2 g/dL)<sup>21</sup> and all patients (100%, 42/42) in another study  
142 on VL in pregnant women from Sudan (transfusion based on severe anaemia)<sup>22</sup>. In 3 studies  
143 that explicitly enrolled children <15 years, of the 112 enrolled, 29 required transfusions  
144 (**Table 2 and supplemental table 1**); the criteria for transfusion was Hb concentration <4  
145 g/dL along pre-existing hemorrhagic problems in a study from India<sup>23</sup> and this unclear in  
146 studies from Yemen<sup>24</sup> and East Africa<sup>20</sup>.

147 Two studies enrolled patients with HIV co-infections; 23/44 (52.2%) patients from a  
148 study in Brazil<sup>16</sup> required transfusion; and the actual number of patients requiring  
149 transfusion was not reported in a study from Ethiopia (n=23 enrolled; number requiring  
150 transfusions was not reported)<sup>25</sup>.



151 **Risk of bias assessment in studies included**

152           Of the 16 studies included, 4 were randomised, and 12 were non-randomised  
153 studies. The four randomised studies were judged to be at high/unclear risk of bias on  
154 blinding domain, low or unclear risk of bias on sequence generation and allocation conceal  
155 domain. Of the 12 non-randomised studies, all of them were either open label or this  
156 description was unclear, bias in participants selection was considered low/moderate in 10  
157 studies, high in 1 study, and unclear in 1 study. Risk of bias assessment is presented in  
158 **supplemental file 1.**

## 159 Discussion

160 From the studies indexed in the IDDO VL clinical trials library, reporting of  
161 information on blood transfusion was not explicit in the majority of clinical trials. These  
162 could be partly due to the exclusion of patients with severe anaemia or severe disease in  
163 standard efficacy studies in VL. For example, approximately 40% of the 160 therapeutic  
164 efficacy studies excluded patients with haemoglobin concentrations less than 5 g/dL. The  
165 combination of inclusion/exclusion criteria adopted will likely lead to the exclusion of severe  
166 patients who may be less likely to require transfusion. From the 16 studies that clearly  
167 reported occurrences (or absences) of blood transfusion, the criteria adopted for  
168 transfusion varied between the studies. Most of the studies reported initiating blood  
169 transfusion based on thresholds of haemoglobin concentration or anaemia status, without  
170 taking other factors (for example, clinical stability/bleeding conditions/poor health) into  
171 consideration; the haemoglobin concentration used as a transfusion trigger ranged from 3-8  
172 g/dL. This wide variation is particularly relevant as recent studies (non-VL context) have  
173 pointed towards the lack of benefit of blood transfusion in preventing mortality when  
174 transfusion is initiated at haemoglobin concentration greater than 4 g/dL.<sup>26-29</sup> Such  
175 assessment of the risk-benefit ratio associated with transfusion was not possible in this  
176 review as clinical outcomes were not disaggregated by transfusion status in the included  
177 studies. In addition to these criteria, it is also important to consider further haemodynamic  
178 stability and clinical history of patients, such as heart conditions, when considering the  
179 adoption of a transfusion threshold.<sup>30</sup>

180 The current WHO guidelines on the management of paediatric anaemia recommend  
181 carrying out transfusion when haemoglobin concentration is below 4 g/dL, and among those

182 with non-severe anaemia (haemoglobin 4-6 g/dL), transfusion is only indicated if the child  
183 presents with other clinical features including dehydration and heart failure.<sup>31</sup> For adults,  
184 specific guidelines among critically ill patients in the ICU have advocated a threshold of 7  
185 g/dL and have recommended further personalising the transfusion decision based on the  
186 clinical condition of the patient.<sup>32</sup> However, only three studies included in this review  
187 reported carrying out transfusion using a combination of haemoglobin concentration and  
188 further clinical criteria such as clinical stability, poor health or active bleeding, such as  
189 epistaxis (**Table 1**). This is particularly relevant as the ability to tolerate anaemia can partly  
190 depend on the speed of its evolution, as compensatory mechanisms can enable relatively  
191 severe degrees of anaemia to be tolerated if it develops over a prolonged duration.<sup>33</sup> VL  
192 primarily affects the poor and marginalised populations with limited access to healthcare,  
193 leading to a prolonged duration of illness prior to presentation. As the disease itself often  
194 evolves insidiously over weeks or months, and patients often receive care late in the disease  
195 course, anaemia evolves over a prolonged.<sup>34</sup> Therefore, in VL patients, it can be anticipated  
196 that compensatory mechanisms will have led to a physiological adaptation to anaemia.  
197 However, acute anaemia arising as a result of acute bleeding occurring due to complications  
198 during splenic puncture or post-partum haemorrhage among pregnant VL patients<sup>35</sup> can  
199 overwhelm the compensatory mechanisms of the body and can be fatal, thus requiring  
200 immediate transfusion.

201 Further caution is urged when transfusing patients who present with severe acute  
202 malnutrition (a common feature of VL patients), as fluid overload and respiratory  
203 impairment are a recognised and feared complication in patients with hypoalbuminemia.<sup>31</sup>  
204 In the studies included in this review, one case of transfusion reaction was reported<sup>20</sup>; but  
205 specific details on the nature of this adverse event were not presented. In other studies

206 included in this review, no reports on the occurrence of transfusion reactions or transfusion-  
207 associated risks were reported. However, the absence of reporting of such occurrences  
208 cannot be taken as evidence of absence of adverse events. In general, transfusion reactions  
209 are estimated to occur up to 1 per 100 transfusions.<sup>36</sup> There are no such estimates specific  
210 to the VL context, and the risks associated with transfusion in the context of VL are not well  
211 understood.

212 From the relatively limited set of studies that reported the occurrences of  
213 transfusions, the median proportion of patients who received blood transfusions was 8%  
214 (n=10 studies). As mentioned earlier, patients with severe anaemia or those with severe VL  
215 and pre-existing co-morbidities are excluded in standard therapeutic efficacy studies leading  
216 to the inclusion of mostly uncomplicated VL cases. Therefore, the incidence of transfusion in  
217 routine clinical practice is likely to be much higher. This suggests that there might be a  
218 substantial economic/logistic cost to the healthcare facilities arising from the requirement  
219 of transfusion in the management of VL patients. The cost could also be further increased as  
220 a central cause of anaemia may require multiple transfusions leading to increased  
221 expenditure and the management of potential safety risks associated with transfusion alone  
222 <sup>37-39</sup>, while the benefit for the patients may not be warranted.

223 There are several limitations with this review. Of the 160 clinical studies in the VL  
224 IDDO systematic review library, the majority of the studies didn't report any transfusion  
225 related data. Data on the number of transfusions carried out were also not reported;  
226 therefore, the actual number of transfusion episodes remains unclear. Overall, these  
227 indicate generally high or unclear risk of bias in the studies included with respect to  
228 assessing blood transfusion and their effect on treatment. However, since blood transfusion

229 isn't the main focus of the efficacy studies, lack of details regarding transfusion and  
230 outcomes prevented a thorough assessment of risk of bias. Instead, the overall quality of  
231 studies were assessed using standard risk of bias tools. Another aspect to be considered is  
232 the influence of the conditions of the health services where the patients gathered here were  
233 originally treated, including the possibility of different local guidelines for transfusions. For  
234 example, three studies reported undertaking haematological profile correction prior to  
235 enrolment of patients without describing if any transfusions were carried out.<sup>15,40,41</sup> Such  
236 practice can affect the requirement for transfusion during the study. Similarly, access to  
237 blood products is relatively difficult in some countries, which may have contributed to the  
238 observed differences in the rate of transfusions between studies. Finally, from the reports  
239 included in this review, it was not possible to reliably assess if some patient groups were  
240 more or less likely to require transfusion than others; this would require an individual  
241 participant data meta-analysis.

242 A checklist of items for reporting data related to transfusion is proposed in Box 1.  
243 Adoption of such a checklist can facilitate better reporting of the transfusion-related  
244 parameters and can enable a thorough assessment of the risks and benefits of transfusion  
245 strategies adopted among VL patients in the future. Additionally, the standardisation and  
246 completeness of haematological data in VL studies before, during and after treatment,  
247 including information concerning blood transfusions, therapy and clinical outcome  
248 stratification, may also help in recognising the dynamics of VL clinical improvement after  
249 treatment, over time, contributing to the establishment of operational definitions to  
250 support cure assessment.

251 **Conclusions**

252 Data regarding blood transfusions remain largely unreported in therapeutic efficacy  
253 studies on VL, with information available only on 16 therapeutic efficacy studies published  
254 since 1980. When reported, the decision to undertake transfusion was often found to be  
255 solely based on the haemoglobin concentration of the patients, with only three studies  
256 incorporating additional clinical criteria. Overall, this review represents the initial step in  
257 acknowledging the magnitude of the gap related to blood derivatives use and points to the  
258 need for harmonisation of the clinical data presentation in VL prospective studies. The  
259 research community should adopt a standardised method for the reporting of transfusion  
260 episodes so that the true benefit of transfusion in VL case management can be reliably  
261 assessed.

262

263 **Authors' contributions**

264 Study Conception: PD, SSP, KS, PJG

265 Methodology: PD, SSP

266 Data curation: PD, SSP

267 Project supervision: SSP, KS, PJG

268 Project administration: PD, SSP

269 Funding acquisition: PJG

270 Writing-original draft: PD, SSP, JW, GC, KR, AM, FA, KS, PJG

271 Writing- review and editing: All authors were involved in reading and critical revision of the  
272 initial draft and approved the final manuscript.

273

274 **Funding**

275 This work is funded by a Bill & Melinda Gates Foundation grant to the Infectious Diseases

276 Data Observatory, Oxford University, UK (Recipient: Prof. Philippe Guerin; ref: INV-004713).

277 Funding agency had no role in developing the manuscript or its publication.

278

279 **Conflict of Interest**

280 None

281

282 **Data Availability**

283 All the data used in this review are available within supplemental file 1.

284

285

286

## 287   **References**

- 288    1.    Boelaert M, Sundar S. 47. Leishmaniasis. In: Jeremy Farrar, Peter Hotez, Thomas  
289        Junghanss, Gagandeep Kang, David Lalloo and NJW, ed. *Manson's Tropical Diseases*.  
290        Elsevier Health Sciences; 2014:631-651.
- 291    2.    Goto Y, Cheng J, Omachi S, Morimoto A. Prevalence, severity, and pathogenesis of  
292        anemia in visceral leishmaniasis. *Parasitol Res.* 2017;116(2):457-464.  
293        doi:10.1007/s00436-016-5313-x
- 294    3.    Vitamin and Mineral Nutrition Information System. World Health Organization.  
295        Haemoglobin concentrations for the diagnosis of anaemia and assessment of severity.  
296        Geneva, Switzerland, World Health Organization (WHO/NMH/NHD/MNM/11.1).  
297        doi:2011
- 298    4.    WHO. Guideline for diagnosis, treatment & prevention of leishmaniasis in Ethiopia.  
299        WHO. Published 2013. Accessed July 28, 2021.  
300        [https://www.who.int/leishmaniasis/burden/Guideline\\_for\\_diagnosis\\_treatment\\_and](https://www.who.int/leishmaniasis/burden/Guideline_for_diagnosis_treatment_and_prevention_of_leishmaniasis_in_Ethiopia.pdf)  
301        [\\_prevention\\_of\\_leishmaniasis\\_in\\_Ethiopia.pdf](https://www.who.int/leishmaniasis/burden/Guideline_for_diagnosis_treatment_and_prevention_of_leishmaniasis_in_Ethiopia.pdf)
- 302    5.    Federal Ministry of Health - Republic of Sudan. Manual for the diagnosis and  
303        treatment of leishmaniasis. WHO. Published 2014. Accessed July 28, 2021.  
304        [https://www.who.int/leishmaniasis/burden/Manual\\_for\\_the\\_diagnosis\\_and\\_treatme](https://www.who.int/leishmaniasis/burden/Manual_for_the_diagnosis_and_treatment_Leishmaniasis_Guideline_Sudan_2014.pdf?ua=1)  
305        [nt\\_Leishmaniasis\\_Guideline\\_Sudan\\_2014.pdf?ua=1](https://www.who.int/leishmaniasis/burden/Manual_for_the_diagnosis_and_treatment_Leishmaniasis_Guideline_Sudan_2014.pdf?ua=1)
- 306    6.    National Vector Borne Disease Control Programme. Operational guidelines on kala-  
307        azar (visceral leishmaniasis) elimination in India - 2015. WHO. Published 2015.  
308        Accessed October 29, 2019.



- 309 [https://www.who.int/leishmaniasis/burden/Operational\\_guidelines\\_on\\_kala\\_azar\\_el](https://www.who.int/leishmaniasis/burden/Operational_guidelines_on_kala_azar_elimination_in_India.pdf)  
310 [mination\\_in\\_India.pdf](https://www.who.int/leishmaniasis/burden/Operational_guidelines_on_kala_azar_elimination_in_India.pdf)
- 311 7. Ministry of Health R of K. Prevention, diagnosis and treatment of Visceral  
312 Leishmaniasis (Kala-Azar) in Kenya. Published 2017. Accessed August 30, 2019.  
313 [https://www.who.int/leishmaniasis/burden/Kala\\_Azar\\_Kenya\\_2017.pdf?ua=1](https://www.who.int/leishmaniasis/burden/Kala_Azar_Kenya_2017.pdf?ua=1)
- 314 8. Ministry of Health - Somali Fedral Government. Guidelines for diagnosis , treatment  
315 and prevention of visceral leishmaniasis in Somalia. WHO. Published 2012. Accessed  
316 July 28, 2021.  
317 [https://www.who.int/leishmaniasis/burden/Guidelines\\_for\\_diagnosis\\_treatment\\_an](https://www.who.int/leishmaniasis/burden/Guidelines_for_diagnosis_treatment_and_prevention_of_VL_in_Somalia.pdf)  
318 [d\\_prevention\\_of\\_VL\\_in\\_Somalia.pdf](https://www.who.int/leishmaniasis/burden/Guidelines_for_diagnosis_treatment_and_prevention_of_VL_in_Somalia.pdf)
- 319 9. Infectious Diseases Data Observatory. VL Surveyor. Published 2023. Accessed January  
320 9, 2023. <https://www.iddo.org/vlSurveyor/#0>
- 321 10. Bush JT, Wasunna M, Alves F, et al. Systematic review of clinical trials assessing the  
322 therapeutic efficacy of visceral leishmaniasis treatments: A first step to assess the  
323 feasibility of establishing an individual patient data sharing platform. *PLoS Negl Trop*  
324 *Dis.* 2017;11(9):1-16. doi:10.1371/journal.pntd.0005781
- 325 11. R Core Team. R: A language and environment for statistical computing. *R Found Stat*  
326 *Comput Vienna, Austria*. Published online 2018.
- 327 12. Sterne JAC, Savović J, Page MJ, et al. RoB 2: A revised tool for assessing risk of bias in  
328 randomised trials. *BMJ.* 2019;366(14898):1-8. doi:10.1136/bmj.l4898
- 329 13. Sterne JA, Hernán MA, Reeves BC, et al. ROBINS-I: A tool for assessing risk of bias in  
330 non-randomised studies of interventions. *BMJ.* 2016;355:4-10. doi:10.1136/bmj.i4919

- 331 14. Thakur CP. Epidemiological, clinical and therapeutic features of Bihar kala-azar  
332 (including post kala-azar dermal leishmaniasis). *Trans R Soc Trop Med Hyg.*  
333 1984;78(3):391-398. doi:10.1016/0035-9203(84)90131-7
- 334 15. Thakur CP, Sinha GP, Pandey AK, Barat D, Sinha PK. Amphotericin B in resistant kala-  
335 azar in Bihar. *Natl Med J India.* 1993;6(2):57-60.
- 336 16. Cota GF, de Sousa MR, de Mendonça ALP, et al. Leishmania-HIV Co-infection: Clinical  
337 Presentation and Outcomes in an Urban Area in Brazil. *PLoS Negl Trop Dis.*  
338 2014;8(4):2-8. doi:10.1371/journal.pntd.0002816
- 339 17. Thakur CP, Kumar A, Mitra DK, Roy A, Sinha AK, Ranjan A. Improving outcome of  
340 treatment of Kala-Azar by supplementation of amphotericin B with physiologic saline  
341 and potassium chloride. *Am J Trop Med Hyg.* 2010;83(5):1040-1043.  
342 doi:10.4269/ajtmh.2010.10-0255
- 343 18. Thakur CP, Singh RK, Hassan SM, Kumar R, Narain S, Kumar A. Amphotericin B  
344 deoxycholate treatment of visceral leishmaniasis with newer modes of administration  
345 and precautions: A study of 938 cases. *Trans R Soc Trop Med Hyg.* 1999;93(3):319-  
346 323. doi:10.1016/S0035-9203(99)90037-8
- 347 19. Moore E, O'Flaherty D, Heuvelmans H, et al. Comparison of generic and proprietary  
348 sodium stibogluconate for the treatment of visceral leishmaniasis in Kenya. *Bull*  
349 *World Health Organ.* 2001;79(5):388-393. doi:10.1590/S0042-96862001000500004
- 350 20. Mbui J, Olobo J, Omollo R, et al. Pharmacokinetics, safety and efficacy of an allometric  
351 miltefosine regimen for the treatment of visceral leishmaniasis in Eastern African  
352 children: an open-label, phase-II clinical trial. *Clin Infect Dis.* Published online 2018.

- 353           doi:10.1093/cid/ciy747
- 354   21.   Rees PH, Kager PA, Welde BT, Hockmeyer WT. The response of Kenyan kala-azar to  
355           treatment with sodium stibogluconate. *Am J Trop Med Hyg.* 1984;33(3):357-361.  
356           doi:10.4269/ajtmh.1984.33.357
- 357   22.   Adam GK, Abdulla MA, Ahmed AA, Adam I. Maternal and perinatal outcomes of  
358           visceral leishmaniasis (kala-azar) treated with sodium stibogluconate in eastern  
359           Sudan. *Int J Gynecol Obstet.* 2009;107(3):208-210. doi:10.1016/j.ijgo.2009.08.002
- 360   23.   Thakur CP, Sinha GP, Sharma V, Pandey AK, Sinha PK, Barat D. Efficacy of  
361           amphotericin B in multi-drug resistant kala-azar in children in first decade of life.  
362           *Indian J Pediatr.* 1993;60(1):29-36. doi:10.1007/BF02860503
- 363   24.   Haider NA, Diab A-BL, EL-Sheikh AM. Visceral Leishmaniasis in children in the Yemen.  
364           *Saudi Med J.* 1990;11(2):99-104.
- 365   25.   Berhe N, Wolday D, Hailu A, et al. HIV viral load and response to antileishmanial  
366           chemotherapy in co-infected patients. *AIDS.* 1999;13(14):1921-1925.  
367           doi:10.1097/00002030-199910010-00015
- 368   26.   Lackritz EM, Campbell C, Ruebush II T, et al. Effect of blood transfusion on survival  
369           among children in a Kenyan hospital. *Lancet.* 1992;340:524-528.
- 370   27.   Hebert PC, Wells G, Blajchman MA, et al. A Multicenter, Randomized, Controlled  
371           Clinical Trial of Transfusion Requirements in Critical Care. *J Urol.* 1999;162(1):280-  
372           280. doi:10.1097/00005392-199907000-00110
- 373   28.   Carson JL, Sieber F, Cook DR, et al. Liberal versus restrictive blood transfusion  
374           strategy: 3-year survival and cause of death results from the FOCUS randomised

- 375 controlled trial. *Lancet*. 2015;385(9974):1183-1189. doi:10.1016/S0140-
- 376 6736(14)62286-8
- 377 29. Maitland K, Ohuma EO, Mpoya A, Uyoga S, Hassall O, Williams TN. Informing
- 378 thresholds for paediatric transfusion in Africa: The need for a trial. *Wellcome Open*
- 379 *Res*. 2019;4:1-25. doi:10.12688/wellcomeopenres.15003.2
- 380 30. Kansagara D, Dyer E, Englander H, Fu R, Freeman M, Kagen D. Treatment of anemia in
- 381 patients with heart disease: A systematic review. *Ann Intern Med*. 2013;159(11):746-
- 382 757. doi:10.7326/0003-4819-159-11-201312030-00007
- 383 31. WHO. *Pocket Book of Hospital Care for Children: Guidelines for the Management of*
- 384 *Common Childhood Illnesses - 2nd Ed.*; 2013.
- 385 32. Retter A, Wyncoll D, Pearse R, et al. Guidelines on the management of anaemia and
- 386 red cell transfusion in adult critically ill patients. *Br J Haematol*. 2013;160(4):445-464.
- 387 doi:10.1111/bjh.12143
- 388 33. Vincent JL. Which carries the biggest risk: Anaemia or blood transfusion? *Transfus Clin*
- 389 *Biol*. 2015;22(3):148-150. doi:10.1016/j.tracli.2015.05.001
- 390 34. Lucy Paintain, Hererro M, Aggarwal V, et al. Cross-sectional surveys in Bangladesh,
- 391 India, Ethiopia & Sudan: understanding treatment seeking & household economic
- 392 burden for VL patients. In: *WorldLeish Congress, 16-20 May 2017, Toledo, Spain.* ;
- 393 2017.
- 394 35. Pekelharing JE, Gatluak F, Harrison T, Maldonado F, Siddiqui MR, Ritmeijer K.
- 395 Outcomes of visceral leishmaniasis in pregnancy: A retrospective cohort study from
- 396 South Sudan. *PLoS Negl Trop Dis*. 2020;14(1):e0007992.

- 397           doi:<https://dx.doi.org/10.1371/journal.pntd.0007992>
- 398   36.   Delaney M, Wendel S, Bercovitz RS, et al. Transfusion reactions: prevention,  
399           diagnosis, and treatment. *Lancet*. 2016;388(10061):2825-2836. doi:10.1016/S0140-  
400           6736(15)01313-6
- 401   37.   Burchenal JH, Bowers RF, Haedicke TA. Visceral Leishmaniasis Complicated by Severe  
402           Anemia—Improvement Following Splenectomy. *Am J Trop Med Hyg*. 1947;27(6):699-  
403           709. doi:<https://doi.org/10.4269/ajtmh.1947.s1-27.699>
- 404   38.   Cachia EA, Fenech FF. A review of kala-azar in Malta from 1947 to 1962. *Trans R Soc*  
405           *Trop Med Hyg*. 1964;58(3):234-241. doi:10.1016/0035-9203(64)90035-5
- 406   39.   Grech V, Mizzi J, Mangion M, Vella C. Visceral leishmaniasis in Malta - An 18 year  
407           paediatric, population based study. *Arch Dis Child*. 2000;82(5):381-385.  
408           doi:10.1136/adc.82.5.381
- 409   40.   Thakur CP, Ahmed S. Observations on amphotericin B treatment of kala-azar given in  
410           a rural set up in Bihar, India. *Indian J Med Res*. 2001;113(JAN.):14-18.
- 411   41.   Ekram MR, Amin MR, Hasan MJ, et al. Efficacy and safety of single-dose liposomal  
412           amphotericin B in patients with visceral leishmaniasis in Bangladesh: a real-life  
413           experience. *J Parasit Dis*. 2021;45(4):903-911. doi:10.1007/s12639-021-01379-w
- 414   42.   Thakur CP, Kumar M, Kumar P, Mishra BN, Pandey AK. Rationalisation of regimens of  
415           treatment of kala-azar with sodium stibogluconate in India: A randomised study. *Br*  
416           *Med J (Clin Res Ed)*. 1988;296(6636):1557-1561. doi:10.1136/bmj.296.6636.1557
- 417   43.   Thakur CP, Kumar M, Pandey AK. Comparisons of regimens of treatment of antimony-  
418           resistant Kala-Azar patients: A randomized study. *Am J Trop Med Hyg*. 1991;45(4).

- 419 44. Dietze R, Milan E, Berman J, Groggl M, et al. Treatment of Brazilian kala-azar with a  
420 short course of amphocil (amphotericin B cholesterol dispersion). *Clin Infect Dis*.  
421 1993;17(6):981-986.
- 422 45. Thakur CP, Singh RK, Hassan SM, Kumar R, Narain S, Kumar A. Amphotericin B  
423 deoxycholate treatment of visceral leishmaniasis with newer modes of administration  
424 and precautions: A study of 938 cases. *Trans R Soc Trop Med Hyg*. 1999;93(3):319-  
425 323. doi:10.1016/S0035-9203(99)90037-8
- 426 46. Moore E, O'Flaherty D, Heuvelmans H, et al. Comparison of generic and proprietary  
427 sodium stibogluconate for the treatment of visceral leishmaniasis in Kenya. *Bull*  
428 *World Health Organ*. 2001;79(5):388-393.
- 429 47. Mueller Y, Nguimfack A, Cavailler P, et al. Safety and effectiveness of amphotericin B  
430 deoxycholate for the treatment of visceral leishmaniasis in Uganda. *Ann Trop Med*  
431 *Parasitol*. 2008;102(1):11-19. doi:10.1179/136485908X252142
- 432 48. Das VNR, Siddiqui NA, Pandey K, et al. A controlled, randomized nonblinded clinical  
433 trial to assess the efficacy of amphotericin B deoxycholate as compared to  
434 pentamidine for the treatment of antimony unresponsive visceral leishmaniasis cases  
435 in Bihar, India. *Ther Clin Risk Manag*. 2009;5(1):117-124. doi:10.2147/TCRM.S3581  
436

437 **Table 1: Haematological parameters considered for defining inclusion/exclusion criteria for patient enrolment**

| <b>Haematological parameters</b>        | <b>Number of studies<br/>(number of patients)</b> | <b>% (n=160)</b> |
|-----------------------------------------|---------------------------------------------------|------------------|
| Minimum haemoglobin concentration       |                                                   |                  |
| >3 g/dL                                 | 8 (n=1,804)                                       | 5.0%             |
| >3 to <=5 g/dL                          | 38 (n=11,452)                                     | 23.8%            |
| >5 to <=7 g/dL                          | 22 (n=2,644)                                      | 13.8%            |
| Unclear                                 | 92 (n=19,863)                                     | 57.5%            |
| Prothrombin time (above control values) |                                                   |                  |
| >4 seconds                              | 9 (n=1,277)                                       | 5.6%             |
| >5 seconds                              | 14 (n=5,599)                                      | 8.8%             |
| >15 seconds                             | 2 (n=631)                                         | 1.3%             |
| >20 seconds                             | 1 (n=89)                                          | 0.6%             |
| Prothrombin activity <40%               | 1 (n=57)                                          | 0.6%             |
| INR >2                                  | 1 (n=378)                                         | 0.6%             |
| Unclear                                 | 132 (27,732)                                      | 82.5%            |
| Minimum platelets concentration         |                                                   |                  |
| >4,000/ $\mu$ L                         | 1 (n=30)                                          | 0.6%             |
| >5,000/ $\mu$ L                         | 1 (n=60)                                          | 0.6%             |
| >20,000/ $\mu$ L                        | 1 (n=378)                                         | 0.6%             |
| >30,000/ $\mu$ L                        | 2 (n=38)                                          | 1.3%             |
| >40,000/ $\mu$ L                        | 22 (n=7,432)                                      | 13.8%            |
| >50,000/ $\mu$ L                        | 19 (2,681)                                        | 11.9%            |
| >60,000/ $\mu$ L                        | 1 (n=230)                                         | 0.6%             |
| >75,000/ $\mu$ L                        | 1 (n=120)                                         | 0.6%             |
| >80,000/ $\mu$ L                        | 4 (n=50)                                          | 2.5%             |

|                   |                              |                |       |
|-------------------|------------------------------|----------------|-------|
|                   | Unclear                      | 108 (n=24,274) | 67.5% |
| Minimum WBC count |                              |                |       |
|                   | <750/ $\mu$ L                | 1 (n=412)      | 0.6%  |
|                   | <1,000/ $\mu$ L              | 18 (n=7,086)   | 11.3% |
|                   | <2,000/ $\mu$ L              | 8 (n=756)      | 5.0%  |
|                   | <1,000/mL                    | 1 (n=30)       | 0.6%  |
|                   | <2,000/nL                    | 1 (n=39)       | 0.6%  |
|                   | granulocytes <1,000/ $\mu$ l | 18 (n=3,636)   | 11.3% |
|                   | granulocytes <2,000/ $\mu$ l | 1 (n=45)       | 0.6%  |
|                   | Unclear                      | 112 (n=23,763) | 70.0% |

438 INR= International normalisation ratio



439 **Table 2: Description of transfusion in clinical studies of VL indexed in the IDDO living systematic review library**

| Author-year               | Country | Drug regimen                   | Total enrolled | Number of transfusions | Transfusion rules                                                                                | Transfused product | Description                                                                                                                                                                                                                                                                                                                                                                                                                              | Number of Patients requiring transfusion at baseline | Transfusion during treatment /follow-up                 |
|---------------------------|---------|--------------------------------|----------------|------------------------|--------------------------------------------------------------------------------------------------|--------------------|------------------------------------------------------------------------------------------------------------------------------------------------------------------------------------------------------------------------------------------------------------------------------------------------------------------------------------------------------------------------------------------------------------------------------------------|------------------------------------------------------|---------------------------------------------------------|
| Rees-1984 <sup>21</sup>   | Kenya   | SSG                            | 16             | 1                      | Unclear if there were any specific rules (the transfused patient had Hb measurement of 3.2 g/dL) | Blood              | In one pregnant patient with a haemoglobin of 3.2 g/dl, 2 pints of blood were given concomitantly with the commencement of SSG                                                                                                                                                                                                                                                                                                           | -                                                    | Transfused during treatment; unclear number of patients |
| Thakur-1984 <sup>14</sup> | India   | SSG                            | 750            | 4                      | 4 g/dL +poor health OR haemorrhage                                                               | Blood              | If Hb was below 4.0 g/dL and the general condition of the patient was poor, a blood transfusion was given. Blood transfusions were given to all cases with haemorrhage.<br><br>Four cases of cancrum oris were encountered in the early phase of the epidemic when drugs were scarce. With specific treatment, general management with blood transfusion and oral protein supplements and crystalline penicillin, cancrum oris improved. | -                                                    | -                                                       |
| Thakur-1988 <sup>42</sup> | India   | SSG                            | 371            | 0                      | Unclear                                                                                          | No transfusion     | As our patients were selected so that they did not have a haemoglobin concentration of less than 3 g/dL no blood transfusion was required for any patient                                                                                                                                                                                                                                                                                | 0                                                    | 0                                                       |
| Thakur-1991 <sup>43</sup> | India   | Pentamidine; Pentamidine + SSG | 312            | Unclear                | 3 g/dL                                                                                           | Blood              | Patients whose haemoglobin level was less than 3 g/dL were given a blood transfusion, and when the haemoglobin level improved beyond 3 g/dL, they were included in the trial                                                                                                                                                                                                                                                             | Transfused at baseline; Unclear number of patients   | -                                                       |
| Dietze-1993 <sup>44</sup> | Brazil  | ABCD                           | 20             | Unclear                | Unclear                                                                                          | Red cells          | Some patients were administered transfusions of red blood cells during therapy                                                                                                                                                                                                                                                                                                                                                           | -                                                    | Transfused during treatment; unclear number of patients |

|                            |          |                   |     |         |                                            |                       |                                                                                                                                                                                                                                                                                                                                                                                                                                    |                                                    |    |
|----------------------------|----------|-------------------|-----|---------|--------------------------------------------|-----------------------|------------------------------------------------------------------------------------------------------------------------------------------------------------------------------------------------------------------------------------------------------------------------------------------------------------------------------------------------------------------------------------------------------------------------------------|----------------------------------------------------|----|
| Thakur-1993 <sup>23</sup>  | India    | Amphotericin B    | 50  | 4       | 4 g/dL + pre-existing hemorrhagic problems | Blood                 | Patients were given blood transfusions if they had haemoglobin below 4 g/dL, or had any hemorrhagic problems like epistaxis. Epistaxis occurred in 4 patients and it was treated with blood transfusions (Table 1 of the publication indicates transfusions occurred before treatment as no epistaxis occurred)                                                                                                                    | 4                                                  | 0  |
| Berhe-1999 <sup>25</sup>   | Ethiopia | PA                | 23  | Unclear | severe anaemia                             | Blood                 | Blood transfusion was given to patients with severe anaemia and the post-transfusion haemoglobin value among the two groups was not different                                                                                                                                                                                                                                                                                      | -                                                  | -  |
| Thakur-1999 <sup>45</sup>  | India    | AMBd              | 938 | 56      | 5 g/dL                                     | Blood                 | The initial precaution taken was that patients whose haemoglobin level was below 5 g/dL were given blood transfusion first and only when the haemoglobin reached 5 g/dL was treatment for visceral leishmaniasis started. Blood transfusion was required in 54 (6%) patients before start of treatment. Anaemia improved with treatment but in 2 patients, haemoglobin dropped after treatment and they required blood transfusion | 54                                                 | 2  |
| Moore-2001 <sup>46</sup>   | Kenya    | SSG               | 102 | 43      | anaemia                                    | Blood                 | Blood transfusions were available for anaemic patients. Patients required transfusions during and after treatment; as described in Table 2 of the manuscript <sup>46</sup> .                                                                                                                                                                                                                                                       | -                                                  | 43 |
| Haidar-2001 <sup>24</sup>  | Yemen    | SSG               | 32  | 24      | Unclear                                    | Blood                 | Blood transfusions were required for 24 patients (73%)                                                                                                                                                                                                                                                                                                                                                                             | -                                                  | -  |
| Mueller-2008 <sup>47</sup> | Uganda   | AMBd; PA          | 371 | Unclear | severe anaemia                             | Blood                 | Blood transfusions for severe anaemia were given, if necessary                                                                                                                                                                                                                                                                                                                                                                     | -                                                  | -  |
| Das-2009 <sup>48</sup>     | India    | AMBd; Pentamidine | 82  | Unclear | 6 g/dL                                     | Blood                 | In cases of VL, who had severe anaemia (Hb < 6 g/dl), before excluding such patients from the study, an effort was undertaken to increase their haemoglobin level by giving fresh blood transfusion as required                                                                                                                                                                                                                    | Transfused at baseline; Unclear number of patients | -  |
| Adam-2009 <sup>22</sup>    | Sudan    | SSG               | 42  | 42      | severe anaemia                             | Blood                 | All 42 patients received blood transfusions for severe anaemia                                                                                                                                                                                                                                                                                                                                                                     | -                                                  | -  |
| Thakur-2010 <sup>17</sup>  | India    | Amphotericin B    | 230 | Unclear | 5 g/dL                                     | Whole blood/platelets | If patients had haemoglobin levels < 5 g/dL or a thrombocyte count < 65,000 cells/ $\mu$ L, whole blood transfusions or platelet transfusions were given, respectively. If these two parameters reached acceptable levels, only then were the patients included in the trial                                                                                                                                                       | Transfused at baseline; Unclear number of patients | -  |

|                                           |                  |                 |    |     |                                                                    |                                        |                                                                                                                                                                                                                                                                                                                                                                                      |   |   |
|-------------------------------------------|------------------|-----------------|----|-----|--------------------------------------------------------------------|----------------------------------------|--------------------------------------------------------------------------------------------------------------------------------------------------------------------------------------------------------------------------------------------------------------------------------------------------------------------------------------------------------------------------------------|---|---|
| Cota-2014 <sup>16</sup><br>(HIV negative) | Brazil           | PA; AMBd; L-AmB | 46 | 19* | Measured<br>Hb/platelets/INR +<br>clinical<br>instability/bleeding | Red cells or<br>plasma or<br>platelets | In this study, all types of blood products were accounted for between baseline and the end of hospitalisation for VL treatment.<br><br>Specific transfusion rules:<br>platelets: <20,000 + active bleeding or below 50,000 before performing invasive procedures;<br><br>red cells: severe anaemia or Hb < 8 g/dL + clinical instability;<br><br>plasma: INR > 1,5 + active bleeding | - | - |
| Cota-2014 <sup>16</sup><br>(HIV positive) | Brazil           | PA; AMBd; L-AmB | 44 | 23* | Measured<br>Hb/platelets/INR +<br>clinical<br>instability/bleeding | Red cells or<br>plasma or<br>platelets | In this study, all types of blood products were accounted for between baseline and the end of hospitalisation for VL treatment.<br><br>Specific transfusion rules:<br>platelets: <20,000 + active bleeding or below 50,000 before performing invasive procedures;<br><br>red cells: severe anaemia or Hb < 8 g/dL + clinical instability;<br><br>plasma: INR > 1,5 + active bleeding | - | - |
| Mbui-2018 <sup>20</sup>                   | Kenya,<br>Uganda | Miltefosine     | 30 | 1   | Unclear                                                            | Unclear                                | The first had a case of “transfusion reaction” that was considered an important medical event by the investigator, occurring on day 203 after the treatment start                                                                                                                                                                                                                    | - | 1 |

440 Three trials that reported provision for haematological profile correction prior to patients enrolment without describing if any transfusions were carried out; these studies  
441 are not included in this table<sup>15,40,41</sup>.

442 Hb= haemoglobin; SSG = Sodium stibogluconate; PA = Pentavalent antimony; AMB = Amphotericin B; AMBd = Amphotericin B deoxycholate; ABCD= Amphotericin B  
443 colloidal dispersion

444

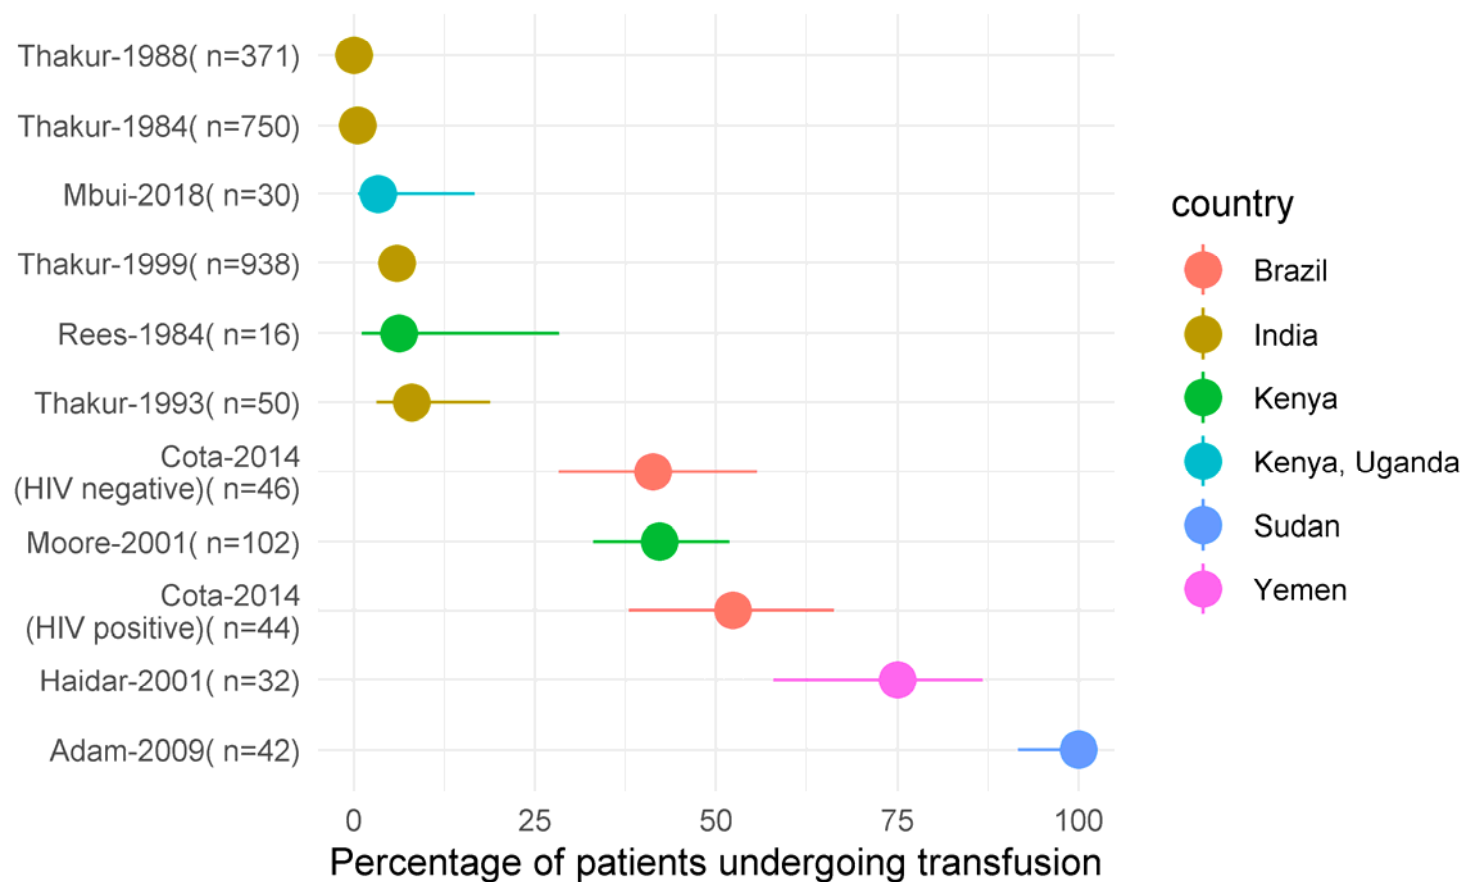

445

446 **Figure 1: Proportion of patients undergoing transfusion in 10 studies that clearly reported the transfusion status**

447 **Box 1: Transfusion parameters**

| Item                                             | Description                                                                                                              |
|--------------------------------------------------|--------------------------------------------------------------------------------------------------------------------------|
| <b>Haematological parameters</b>                 | Rules used for indicating transfusion                                                                                    |
|                                                  | Haemoglobin (or haematocrit) level used for indicating transfusion                                                       |
|                                                  | Information regarding blood/blood products transfused: whole blood, plasma, platelets                                    |
|                                                  | Units of transfused blood/blood products/transfusion volume                                                              |
|                                                  | Time-point of transfusion: before treatment, during treatment (in days) or during the follow-up phase (in days or weeks) |
|                                                  | Reason for transfusion: severe anaemia, acute blood loss, epistaxis/haemorrhage/splenic bleeding                         |
|                                                  | Minimum haemoglobin concentration required for patient enrolment into a study                                            |
|                                                  | Definition of anaemia/severe anaemia                                                                                     |
| <b>Distinction between patients and episodes</b> |                                                                                                                          |
|                                                  | Number of patients who required transfusion                                                                              |
|                                                  | Total number of episodes of transfusion                                                                                  |
| <b>Therapeutic outcomes</b>                      |                                                                                                                          |
|                                                  | Reports of transfusion reactions, including the nature of the transfusion reaction (if any)                              |
|                                                  | Therapeutic outcomes stratified by transfusion status for each drug regimen                                              |

448
